# Supplementary material for: Hydrodeoxygenation reactivity of the carbonyl group and carboxyl group and their interaction: taking 2-pentanone, valeric acid, and levulinic acid as examples
Source: Royal Society of Chemistry journal article supplement (doi:10.1039/d1se02060a), 2022-01-01
Supplement: d1se02060a1.pdf [file d1se02060a1.pdf]

1  
2  
3  
4  
5  
6  
7  
8  
9  
10  
11  
12  
13  
14  
15  
16  
17  
18  
19  
20  
21

## Supporting Information

### **Hydrodeoxygenation Reactivity of Carbonyl Group and Carboxyl Group and Their Interaction: Taking 2-Pentanone, Valeric Acid, and Levulinic Acid as Examples**

Xi Xi<sup>a</sup>, Ye Yang<sup>a</sup>, Hualiang An<sup>\*a</sup>, Xinqiang Zhao<sup>\*a</sup> and Yanji Wang<sup>a</sup>

<sup>a</sup>Hebei Provincial Key Lab of Green Chemical Technology and Efficient Energy Saving, School  
of Chemical Engineering and Technology, Hebei University of Technology, Tianjin 300130,  
China.

\*Corresponding author: Dr Hualiang An: [anhl@hebut.edu.cn](mailto:anhl@hebut.edu.cn);

Prof Xinqiang Zhao: [zhaoxq@hebut.edu.cn](mailto:zhaoxq@hebut.edu.cn)

1  
2  
3  
4  
5  
6  
7  
8  
9  
10  
11  
12  
13  
14  
15  
16  
17  
18  
19  
20  
21  
22  
23  
24  
25  
26  
27  
28  
29  
30  
31  
32

## List of supporting information

### **1. Experimental**

1.1 Preparation of Ru/HZSM-5 catalyst

1.2 HDO reaction of model compounds

1.3 HDO reaction product analysis

**2. Effect of reaction conditions on 2-pentanone HDO** (Table SI-1)

**3. Effect of reaction conditions on valeric acid HDO** (Table SI-2)

**4. GC-MS analysis results of HDO reaction of the mixture of 2-pentanone and valeric acid** (Table SI-3)

**5. GC-MS analysis results of levulinic acid HDO reaction** (Table SI-4)

**6. Calculation of carbon balance in HDO reactions** (Table SI-5)

**7. 2-Pentanone HDO reaction kinetics**

7.1 Effect of internal and external diffusion at different reaction temperatures (Table SI-6)

7.2 Kinetic experiment data (Figure SI-1)

7.3 Comparison of experimentally measured concentrations with those predicted by Langmuir-Hinshelwood models (Figure SI-2)

**8. Valeric acid HDO reaction kinetics**

8.1 Effect of internal and external diffusion at different reaction temperatures (Table SI-7)

8.2 Kinetic experiment data (Figure SI-3)

**9. HDO reaction kinetics of the mixture of 2-pentanone and valeric acid**

9.1 Effect of internal and external diffusion at different reaction temperatures (Table SI-8)

9.2 Kinetic experiment data (Figure SI-4)

**10. Levulinic acid HDO reaction kinetics**

10.1 Effect of internal and external diffusion at different reaction temperatures (Table SI-9)

10.2 Kinetic experiment data (Figure SI-5)

**11. HDO reaction kinetic model statistics** (Table SI-10)

**12. NH<sub>3</sub>-TPD analysis results of Ru/HZSM-5 catalysts with different Si/Al ratios** (Table SI-11)

## 1 13. Py-IR analysis results of Ru/HZSM-5 catalysts with different Si/Al ratios

2 (Figure SI-6)

### 3 1. Experimental

#### 4 1.1 Preparation of Ru/HZSM-5 catalyst

5 Ru/HZSM-5 was prepared by an impregnation process. HZSM-5 (industrial grade, Nankai  
6 University Catalyst Plant) was calcined at 550 °C for 3 h before use. An aqueous solution of  
7 RuCl<sub>3</sub> was prepared by dissolving 0.164 g of RuCl<sub>3</sub>·xH<sub>2</sub>O (AR, Sinopharm Group Chemical  
8 Reagent Co., Ltd.) in 50 mL distilled water. 4 g of the calcined HZSM-5 and the aqueous  
9 solution of RuCl<sub>3</sub> were put into a rotary flask and ultrasonically stirred for 60 min and  
10 evaporated at 70 °C for 1.5 h to remove water. The resulting solid was dried at 110 °C for 12  
11 h, calcined at 550 °C for 4 h, and reduced at 450 °C for 4 h in a H<sub>2</sub>:N<sub>2</sub>=40:60 atmosphere to  
12 obtain Ru/HZSM-5 catalyst.

#### 13 1.2 HDO reaction of model compounds

14 Liquid-phase HDO reactions and kinetic experiments of 2-pentanone (99%, J&K Scientific  
15 Co., Ltd.), valeric acid (>99%, Innochem Technology Co., Ltd.), a mixture of 2-pentanone  
16 and valeric acid, and levulinic acid (98%, J&K Scientific Co., Ltd.) were carried out in a 300  
17 mL Parr autoclave. Taking 2-pentanone as an example, the specific operation steps were as  
18 follows: 12 g of Ru/HZSM-5 catalyst and 120 g of 2-pentanone were placed in the autoclave,  
19 sealed and replaced with hydrogen for 3 times, and then heated under stirring. When the  
20 reaction temperature was reached, the hydrogen flow was introduced for HDO reaction. After  
21 the completion of reaction, the autoclave was cooled down to room temperature. The residual  
22 gas was collected by a gas collection bag and analyzed by gas chromatography. The liquid  
23 product was separated from the catalyst by filtration and then the compositions of filtrate  
24 were analyzed by gas chromatography.

#### 25 1.3 HDO reaction product analysis

##### 26 1.3.1 Qualitative analysis of liquid products

27 The qualitative analysis of HDO products was performed on a Shimadzu QP2010 gas  
28 chromatography-mass spectrometry (GC-MS) equipped with a RTx-WAX column (30  
29 m×0.25 mm×0.25 μm). The temperature of column was controlled by programmed  
30 temperature as follows. For the HDO reaction products of a mixture of 2-pentanone and  
31 valeric acid: an initial temperature of 50 °C and maintained for 2 min, elevated to 53 °C at a  
32 rate of 1 °C/min, increased to 85 °C at 15 °C/min, and finally raised to 250 °C at 3 °C/min and

1 maintained for 5 min. For the LA HDO reaction products: an initial temperature of 50 °C and  
2 maintained for 2 min, raised to 53 °C at 1 °C/min, increased to 85 °C at 15 °C/min, and finally  
3 elevated to 250 °C at 3 °C/min and maintained for 5 min. The mass spectrometry conditions  
4 are as follows: EI source temperature of 250 °C, quadrupole detector temperature of 200 °C,  
5 mass range: 20-550 m/z.

### 6 **1.3.2 Quantitative analysis of liquid products**

7 (1) The composition of 2-pentanone HDO reaction solution was determined on a Shimadzu  
8 GC-2018 gas chromatograph equipped with a flame ionization detector (FID). The  
9 components were separated on a KB-1 capillary column whose temperature was controlled as  
10 following program: an initial temperature of 50 °C and maintained for 2 min, raised to 53 °C  
11 at a ramp of 1 °C/min, elevated to 85 °C at a rate of 15 °C/min, increased to 200 °C at a ramp  
12 of 3 °C/min and maintained for 5 min. The internal standard method was used for quantitative  
13 calculation and cyclohexanol was used as the internal standard.

14 (2) The composition of HDO reaction liquid of valeric acid, a mixture of 2-pentanone and  
15 valeric acid, and LA was separately analyzed by a Shimadzu GC-2030A gas chromatograph  
16 equipped with an FID. The internal standard method was also used for quantitative  
17 calculation. The components were separated on an SH-RTx-WAX capillary column whose  
18 temperature was controlled by the program as follows.

19 For valeric acid HDO reaction liquid: ethyl hexanoate was used as internal standard. The  
20 column temperature control program was as follows: an initial temperature of 50 °C and  
21 maintained for 2 min, raised to 53 °C at a rate of 1 °C/min, then increased to 200 °C at a ramp  
22 of 3 °C/min and maintained for 5 min.

23 For HDO reaction liquid of a mixture of 2-pentanone and valeric acid: ethyl hexanoate was  
24 used as internal standard. The column temperature control program was the same as that in  
25 GC-MS analysis.

26 For LA HDO reaction liquid: ethyl hexanoate as the internal standard. The column  
27 temperature control program was the same as that in GC-MS analysis.

28 Conversion = (amount of model compound charged – amount of model compound left) /  
29 amount of model compound charged ×100%

30 Yield = (amount of target product *n*-pentane formed/amount of model compound  
31 charged) ×100%

### 32 **1.3.3 Analysis of gaseous products**

33 (1) The composition of the gas products was determined using a Shimadzu GC-2018 gas  
34 chromatograph equipped with a thermal conductivity detector (TCD). The gaseous products

1 such as CO, CO<sub>2</sub> and H<sub>2</sub> were separated on a TDX-01 packed column. The content of each  
2 gas component in the gas phase was determined by an external standard method.

3 (2) To quantitatively analyze C<sub>1</sub>~C<sub>4</sub> components, a Shimadzu GC-2030A gas  
4 chromatograph equipped with an FID was used. The gaseous products were separated on a  
5 KB-Al<sub>2</sub>O<sub>3</sub>/Na<sub>2</sub>SO<sub>4</sub> capillary column whose temperature was controlled according to the  
6 following program: started at 60 °C and maintained for 2 min, then raised to 200 °C at a rate  
7 of 10 °C/min and maintained for 10 min. The internal standard method was used for  
8 quantitative calculation and isobutane was used as the internal standard.

## 2. Effect of reaction conditions on 2-pentanone HDO

**Table SI-1** Influence of reaction conditions on 2-pentanone HDO

| Entry | Reaction conditions   |         |                               |        | $X_{\text{MPK}}/\%$ | Yield/% |      | Selectivity/% |      |
|-------|-----------------------|---------|-------------------------------|--------|---------------------|---------|------|---------------|------|
|       | Catalyst amount/wt. % | temp/°C | $P_{(\text{H}_2)}/\text{MPa}$ | time/h |                     | Pentane | MPA  | Pentane       | MPA  |
| 1     | 4                     | 190     | 3                             | 6      | 81.6                | 27.9    | 28.2 | 34.2          | 34.6 |
| 2     | 6                     | 190     | 3                             | 6      | 82.3                | 52.7    | 2.1  | 64.0          | 2.6  |
| 3     | 8                     | 190     | 3                             | 6      | 79.6                | 50.7    | 0.6  | 63.7          | 0.8  |
| 4     | 10                    | 190     | 3                             | 6      | 80.2                | 50.6    | 0.8  | 63.1          | 1.0  |
| 5     | 6                     | 150     | 3                             | 6      | 99.5                | 20.9    | 51.0 | 21.0          | 51.3 |
| 6     | 6                     | 170     | 3                             | 6      | 98.9                | 27.2    | 44.1 | 27.5          | 44.6 |
| 7     | 6                     | 210     | 3                             | 6      | 44.8                | 18.1    | 0.4  | 40.4          | 0.9  |
| 8     | 6                     | 230     | 3                             | 6      | 40.9                | 11.3    | 0.2  | 27.6          | 0.5  |
| 9     | 6                     | 190     | 1                             | 6      | 23.8                | 3.1     | 0.1  | 13.0          | 0.4  |
| 10    | 6                     | 190     | 2                             | 6      | 45.0                | 16.3    | 0.2  | 36.2          | 0.4  |
| 11    | 6                     | 190     | 4                             | 6      | 86.1                | 59.3    | 1.9  | 68.9          | 2.2  |
| 12    | 6                     | 190     | 5                             | 6      | 91.8                | 71.3    | 2.3  | 77.7          | 2.5  |
| 13    | 6                     | 190     | 6                             | 6      | 99.4                | 72.3    | 0.4  | 72.7          | 0.4  |
| 14    | 6                     | 190     | 5                             | 2      | 91.4                | 68.1    | 5.8  | 74.5          | 6.3  |
| 15    | 6                     | 190     | 5                             | 4      | 91.9                | 67.9    | 4.7  | 73.9          | 5.1  |
| 16    | 6                     | 190     | 5                             | 8      | 90.3                | 54.4    | 5.2  | 60.2          | 5.8  |

MPK: 2-pentanone; MPA: 2-pentanol; X: conversion

### 3. Effect of reaction conditions on valeric acid HDO

**Table SI-2** Influence of reaction conditions on valeric acid HDO

| Entry | Reaction conditions   |                    |                 |        | $X_{VA}/\%$ | $S_{C5}/\%$ | Amount of gas products ( $\times 10^{-2}$ mmol) |                   |        |       |       |       |       |
|-------|-----------------------|--------------------|-----------------|--------|-------------|-------------|-------------------------------------------------|-------------------|--------|-------|-------|-------|-------|
|       | catalyst amount/wt. % | temp/ $^{\circ}$ C | $P_{(H_2)}/MPa$ | time/h |             |             | CO                                              | $H_2 \times 10^2$ | $CO_2$ | $C_1$ | $C_2$ | $C_3$ | $C_4$ |
| 1     | 5                     | 250                | 5               | 4      | 14.9        | 13.2        | 563.6                                           | 37.5              | 0      | 30.8  | 111.6 | 2.8   | 35.0  |
| 2     | 10                    | 250                | 5               | 4      | 27.7        | 8.0         | 586.0                                           | 36.0              | 0      | 156.0 | 124.0 | 8.0   | 80.0  |
| 3     | 15                    | 250                | 5               | 4      | 30.1        | 7.8         | 601.0                                           | 34.1              | 737.4  | 200.9 | 135.2 | 9.7   | 49.2  |
| 4     | 10                    | 230                | 5               | 4      | 20.0        | 7.3         | 735.1                                           | 42.1              | 0      | 53.8  | 81.3  | 3.5   | 13.1  |
| 5     | 10                    | 240                | 5               | 4      | 33.1        | 7.6         | 765.6                                           | 42.0              | 0      | 87.2  | 13.8  | 7.4   | 96.3  |
| 6     | 10                    | 260                | 5               | 4      | 27.2        | 7.3         | 576.7                                           | 30.2              | 760.0  | 176.3 | 30.0  | 159.6 | 64.7  |
| 7     | 10                    | 240                | 3               | 4      | 21.7        | 2.2         | 440.3                                           | 33.0              | 0      | 68.4  | 75.0  | 4.7   | 48.4  |
| 8     | 10                    | 240                | 4               | 4      | 32.4        | 5.0         | 643.9                                           | 32.3              | 0      | 66.6  | 11.0  | 3.8   | 46.1  |
| 9     | 10                    | 240                | 6               | 4      | 31.6        | 9.2         | 989.1                                           | 72.7              | 915.0  | 83.8  | 13.9  | 4.9   | 69.3  |
| 10    | 10                    | 240                | 5               | 2      | 28.3        | 4.4         | 704.2                                           | 41.3              | 0      | 130.0 | 12.4  | 6.7   | 58.1  |
| 11    | 10                    | 240                | 5               | 6      | 30.6        | 12.8        | 456.4                                           | 26.2              | 539.8  | 93.6  | 80.5  | 10.6  | 93.3  |

VA: valeric acid,  $C_1$ :  $CH_4$ ,  $C_2$ :  $C_2H_4+C_2H_6$ ,  $C_3$ :  $C_3H_8$ ,  $C_4$ :  $C_4H_{10}+C_4H_8$ ,  $C_5$ :  $C_5H_{12}$ , X: conversion, S: selectivity.

1 **4. GC-MS analysis results of HDO reaction of the mixture of 2-pentanone and**  
 2 **valeric acid**

3 **Table SI-3** Identification of components in Ru/HZSM-5 catalyzed HDO reaction of a mixture of  
 4 2-pentanone and valeric acid

| Symbol | Retention time /min | Chemical name           | Chemical formula                               | Constitutional formula                                                                | Similarity /% |
|--------|---------------------|-------------------------|------------------------------------------------|---------------------------------------------------------------------------------------|---------------|
| A      | 1.733               | <i>n</i> -Pentane       | C <sub>5</sub> H <sub>12</sub>                 | 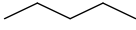   | 93            |
| B      | 1.883               | <i>n</i> -Heptane       | C <sub>7</sub> H <sub>16</sub>                 |     | 97            |
| C      | 1.997               | <i>n</i> -Valeraldehyde | C <sub>5</sub> H <sub>10</sub> O               |    | 96            |
| D      | 2.173               | 4-Methylheptane         | C <sub>8</sub> H <sub>18</sub>                 |     | 95            |
| E      | 2.392               | <i>n</i> -Nonane        | C <sub>9</sub> H <sub>20</sub>                 |     | 95            |
| F      | 2.556               | 4-Methylnonane          | C <sub>10</sub> H <sub>22</sub>                |     | 93            |
| G      | 2.662               | 2-Pentanone             | C <sub>5</sub> H <sub>10</sub> O               |   | 97            |
| H      | 2.864               | <i>n</i> -Decane        | C <sub>10</sub> H <sub>22</sub>                |   | 96            |
| I      | 2.932               | 5-Decene                | C <sub>10</sub> H <sub>20</sub>                |   | 90            |
| J      | 3.553               | 2-Pentanol              | C <sub>5</sub> H <sub>12</sub> O               |  | 97            |
| K      | 4.877               | <i>n</i> -Pentanol      | C <sub>5</sub> H <sub>12</sub> O               |   | 95            |
| L      | 5.712               | Butyl 2-Methylvalerate  | C <sub>10</sub> H <sub>20</sub> O <sub>2</sub> |   | 92            |
| M      | 6.200               | 4-Decanone              | C <sub>10</sub> H <sub>20</sub> O              |   | 94            |
| N      | 7.119               | Pentyl pentanoate       | C <sub>10</sub> H <sub>20</sub> O <sub>2</sub> |   | 95            |
| O      | 10.739              | Valeric acid            | C <sub>5</sub> H <sub>10</sub> O <sub>2</sub>  |   | 94            |

5

6

7

8



## 1 5. GC-MS analysis results of levulinic acid HDO reaction

2 **Table SI-4** Identification of reaction components in levulinic acid HDO catalyzed by Ru/HZSM-5

| Symbol | Retention time /min | Chemical name                             | Chemical formula                              | Constitutional formula                                                                | Similarity /% |
|--------|---------------------|-------------------------------------------|-----------------------------------------------|---------------------------------------------------------------------------------------|---------------|
| A      | 1.817               | <i>n</i> -Pentane                         | C <sub>5</sub> H <sub>12</sub>                | 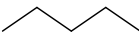   | 87            |
| B      | 1.858               | <i>n</i> -Valeraldehyde                   | C <sub>5</sub> H <sub>10</sub> O              |     | 87            |
| C      | 1.917               | Methyl cyclopentane                       | C <sub>6</sub> H <sub>12</sub>                |    | 98            |
| D      | 2.108               | Acetone                                   | C <sub>3</sub> H <sub>6</sub> O               |    | 96            |
| E      | 3.058               | Toluene                                   | C <sub>7</sub> H <sub>8</sub>                 |    | 98            |
| F      | 3.358               | 2-Hexanone                                | C <sub>6</sub> H <sub>12</sub> O              |    | 96            |
| G      | 4.832               | <i>n</i> -Pentanol                        | C <sub>5</sub> H <sub>12</sub> O              |    | 95            |
| H      | 5.712               | 3-Methylcyclopentanone                    | C <sub>6</sub> H <sub>10</sub> O              |  | 92            |
| I      | 7.225               | Acetic acid                               | C <sub>2</sub> H <sub>4</sub> O <sub>2</sub>  |  | 97            |
| J      | 9.142               | 4-Methyl-3-pentenoic acid                 | C <sub>6</sub> H <sub>10</sub> O <sub>2</sub> |  | 95            |
| K      | 9.358               | $\gamma$ -Valerolactone                   | C <sub>5</sub> H <sub>8</sub> O <sub>2</sub>  |  | 96            |
| L      | 10.675              | Valeric acid                              | C <sub>5</sub> H <sub>10</sub> O <sub>2</sub> |  | 90            |
| M      | 11.442              | 4-Methylpentanoic acid                    | C <sub>6</sub> H <sub>12</sub> O <sub>2</sub> |  | 96            |
| N      | 12.008              | 3-Pentenoic acid                          | C <sub>5</sub> H <sub>8</sub> O <sub>2</sub>  |  | 93            |
| O      | 12.600              | 5-isobutyl-5-Methyldihydrofuran-2(3H)-one | C <sub>9</sub> H <sub>16</sub> O <sub>2</sub> |  | 92            |
| P      | 16.567              | Levulinic acid                            | C <sub>5</sub> H <sub>8</sub> O <sub>3</sub>  |  | 96            |

3

4

## 1 6. Calculation of carbon balance in HDO reactions

2 **Table SI-5** Carbon balance of HDO reactions

|                  | Reaction substrate |              |                            |                |
|------------------|--------------------|--------------|----------------------------|----------------|
|                  | 2-pentanone        | valeric acid | 2-pentanone & valeric acid | levulinic acid |
| carbon balance/% | 94.1               | 71.3         | 76.9                       | 92.7           |

## 3 7. 2-Pentanone HDO reaction kinetics

### 4 7.1 Effect of internal and external diffusion at different reaction temperatures

5 2-Pentanone HDO catalyzed by Ru/HZSM-5 is a gas-liquid-solid three-phase reaction  
6 system and the mass transfer resistance will have a certain effect on the reaction rate. In order  
7 to calculate the reaction rate constant and activation energy, the effects of internal and  
8 external diffusion should be excluded firstly. The Weisz-Prater criterion and Mears criterion  
9 were calculated. The specific calculation process is as follows:

10 (1) Weisz-Prater criterion is utilized to evaluate the effect of internal diffusion:

$$11 \Phi_A = \frac{-r_{A,obs}\rho_p R_p^2}{D_{A,e}C_{A,s}} < 1$$

12 (2) Mears criterion is applied to evaluate the effect of external diffusion:

$$13 \frac{-r_{A,obs}\rho_p R_p^n}{k_A C_{A,s}} < 0.15$$

14 Where  $r_{A,obs}$  represents the observed reaction rate of component A,  $mol/kg \cdot s$ ;  $\rho_p$   
15 indicates the catalyst particle density,  $kg/m^3$ ;  $R_p$  stands for catalyst particle radius, m;  $n$   
16 represents reaction order;  $C_A$  indicates liquid concentration of 2-pentanone,  $mol/m^3$ ;  
17  $D_A$  stands for effective diffusion coefficient,  $m^2/s$ ;  $k_A$  represents mass transfer  
18 coefficient,  $m/s$ .

19 Since  $D_A$  and  $k_A$  cannot be directly measured, they were obtained by calculation. The  
20 specific calculation process is as follows:

21 Calculation of  $D_A$ : Since the average free path of liquid molecule is much less than the pore  
22 size of catalyst [S1] in the heterogeneous system, Knudsen diffusion ( $D_k$ ) can be ignored [S2].  
23 Total diffusion can be simplified to molecular diffusion only, i.e., the total diffusion  
24 coefficient  $D = D_{AB}$ . The above diffusion coefficient was calculated according to the Wilke-

1 Chang equation:

$$D_{AB} = 7.4 \times 10^{-10} \frac{T(XM_A)^{1/2}}{\mu V_b^{0.6}} (\text{cm}^2/\text{s})$$

2

3 The structure of 2-pentanone includes ketone carbonyl group, methylene group and methyl  
4 group. According to the group contribution method<sup>[S1]</sup>,  $V_b=22.7+27.4 \times 2+21.3 \times 2=120.1$ .

5 Similarly, according to the Van Velzen group contribution method<sup>[S3]</sup>, the calculation formula

6 for  $\mu$  can be derived as  $\log \mu = 738.50 \times [(T)^{-1} - (245.38)^{-1}]$ .

7 Calculation of  $k_A$ : according to Frossling relation<sup>[S1]</sup>,

$$Sh = 2 + 0.6Re^{1/2}Sc^{1/3} = 2 + 0.6 \times \left(\frac{Ndd_p}{\nu}\right)^{1/2} \left(\frac{\nu}{D_{AB}}\right)^{1/3}$$

8

$$Sh = \frac{k_A d_p}{D_{AB}}$$

9

10 Where N represents stirring rate, 500 rpm; d indicates impeller diameter, 0.033 m;  $d_p$

11 stands for particle size, mm;  $\nu$  represents the dynamic viscosity,  $\text{m}^2/\text{s}$ .

12 The effects of internal and external diffusion at 150 °C, 170 °C and 190 °C were calculated  
13 using the above criteria and the results are shown in Table SI-6. It can be seen that the Weisz-  
14 Prater criterion value is less than 1 and the Mears criterion value is less than 0.15, indicating  
15 that there is no mass transfer effect under the experimental conditions.

16 **Table SI-6** Effect of internal and external diffusion at different reaction temperatures

| T/°C | $r_{A,obs}/$<br>mol/kg/s | $k_A/$<br>m/s         | $D_{A,e}/$<br>cm <sup>2</sup> /s | $C_{A,S}/$<br>mol/m <sup>3</sup> | $\frac{-r_{A,obs}\rho_p R_p n}{k_A C_{A,S}}$ | $\Phi_A = \frac{-r_{A,obs}\rho_p R_p^2}{D_{A,e} C_{A,S}}$ |
|------|--------------------------|-----------------------|----------------------------------|----------------------------------|----------------------------------------------|-----------------------------------------------------------|
| 150  | $6.20 \times 10^{-4}$    | $1.25 \times 10^{-7}$ | $3.02 \times 10^{-8}$            | $1.39 \times 10^6$               | 0.000193                                     | 0.000999                                                  |
| 170  | $6.16 \times 10^{-4}$    | $1.20 \times 10^{-7}$ | $3.80 \times 10^{-8}$            | $1.39 \times 10^6$               | 0.000199                                     | 0.000791                                                  |
| 190  | $5.13 \times 10^{-4}$    | $1.16 \times 10^{-7}$ | $4.68 \times 10^{-8}$            | $1.39 \times 10^6$               | 0.000172                                     | 0.000534                                                  |

## 17 7.2 Kinetic experiment data

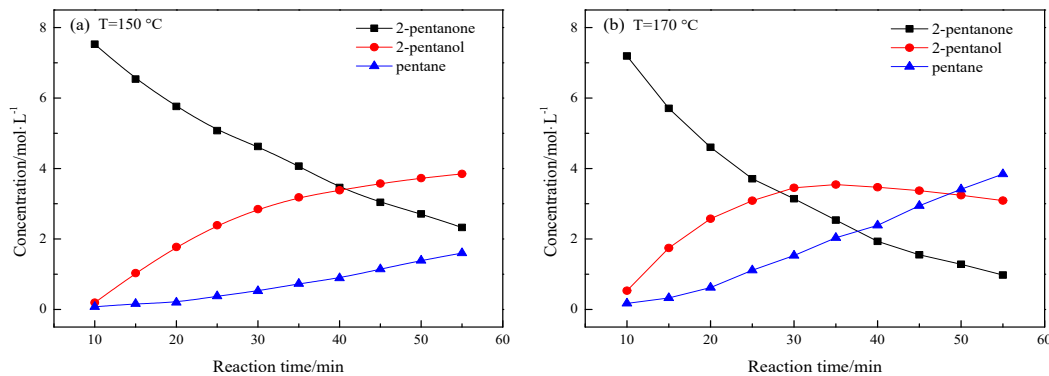

18

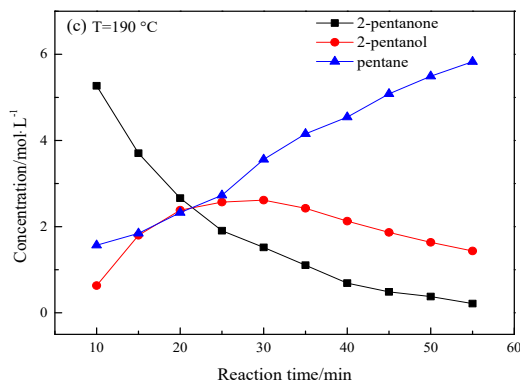

1

2 **Figure SI-1** Concentration of each component vs reaction time at different temperatures

3

(a):150 °C, (b): 170 °C, (c):190 °C

4 **7.3 Comparison of experimentally measured concentrations with those predicted**  
 5 **by Langmuir-Hinshelwood models**

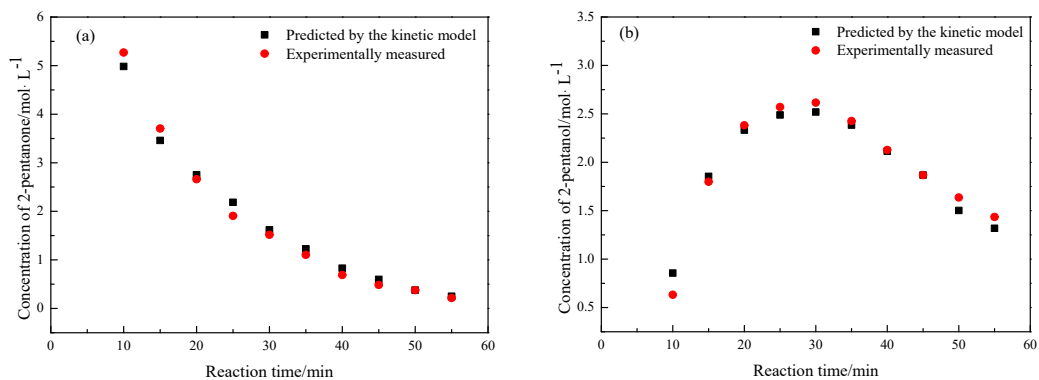

6

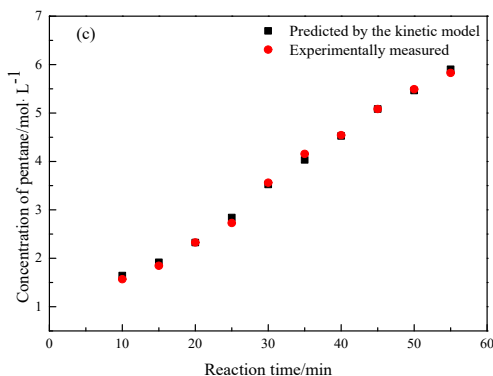

7

8 **Figure SI-2** Comparison of experimentally measured concentrations with those predicted by

9

Langmuir-Hinshelwood models (a): 2- pentanone, (b): 2- pentanol, (c): *n*-pentane

10 **8. Valeric acid HDO reaction kinetics**

11 **8.1 Effect of internal and external diffusion at different reaction temperatures**

12 The Weisz-Prater criterion and the Mears criterion were also used to calculate the effects of  
 13 internal and external diffusion at 220 °C, 230 °C, and 240 °C, respectively. The results are

1 shown in Table SI-7. The Weisz-Prater criterion value is less than 1 and the Mears criterion  
 2 value is less than 0.15, indicating that there is no mass transfer effect under the experimental  
 3 conditions.

4 **Table SI-7** Effect of internal and external diffusion at different reaction temperatures

| T/°C | $r_{A,obs}/$<br>mol/kg/s | $k_A/$<br>m/s         | $D_{A,e}/$<br>m <sup>2</sup> /s | $C_{A,S}/$<br>mol/m <sup>3</sup> | $\frac{-r_{A,obs}\rho_p R_p n}{k_A C_{A,S}}$ | $\Phi_A = \frac{-r_{A,obs}\rho_p R_p^2}{D_{A,e} C_{A,S}}$ |
|------|--------------------------|-----------------------|---------------------------------|----------------------------------|----------------------------------------------|-----------------------------------------------------------|
| 220  | $1.13 \times 10^{-4}$    | $4.54 \times 10^{-8}$ | $0.99 \times 10^{-8}$           | $1.12 \times 10^5$               | 0.000102                                     | $6.91 \times 10^{-6}$                                     |
| 230  | $1.50 \times 10^{-4}$    | $4.49 \times 10^{-8}$ | $1.09 \times 10^{-8}$           | $1.12 \times 10^5$               | 0.000137                                     | $8.39 \times 10^{-6}$                                     |
| 240  | $1.87 \times 10^{-4}$    | $4.44 \times 10^{-8}$ | $1.18 \times 10^{-8}$           | $1.12 \times 10^5$               | 0.000173                                     | $9.62 \times 10^{-6}$                                     |

5

## 6 8.2 Kinetic experiment data

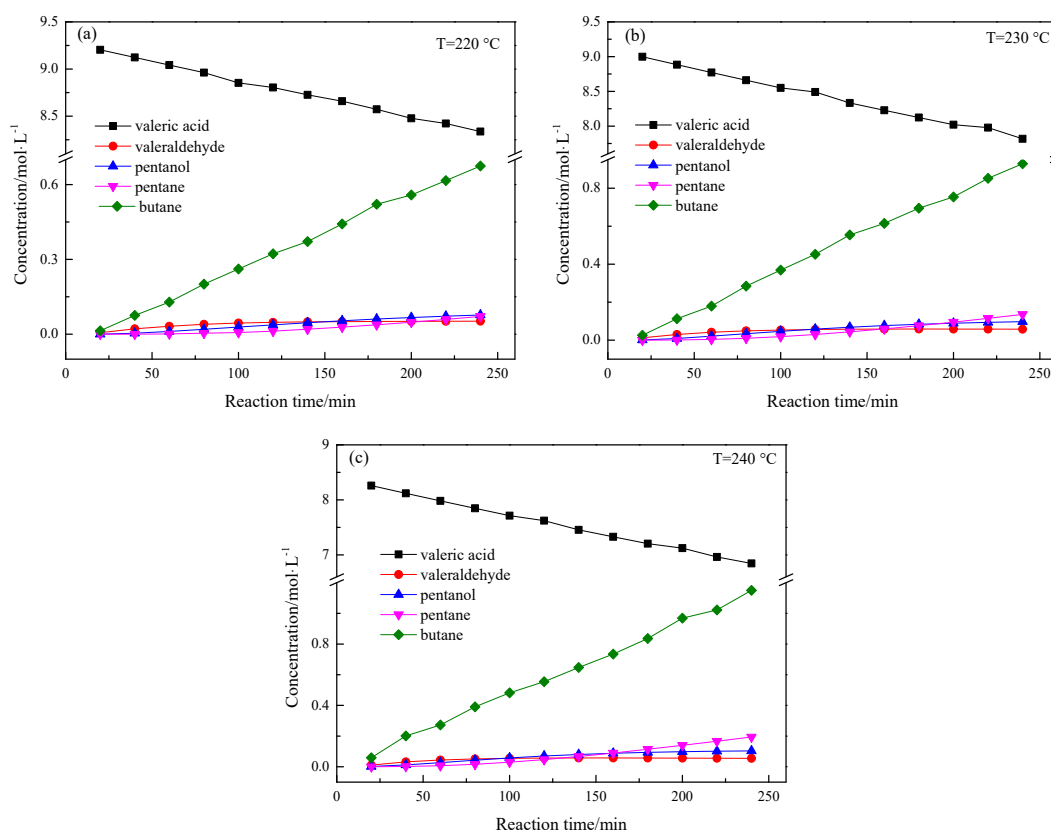

**Figure SI-3** Concentration of each component vs reaction time at different temperatures  
 (a):220 °C, (b): 230 °C, (c):240 °C

## 11 9. HDO reaction kinetics of the mixture of 2-pentanone and valeric acid

### 12 9.1 Effect of internal and external diffusion at different reaction temperatures

13 The Weisz-Prater criterion and the Mears criterion were used to calculate the effects of  
 14 internal and external diffusion at 190 °C, 215 °C, and 240 °C, respectively. The results are  
 15 shown in Table SI-8. It can be seen that the Weisz-Prater criterion value is less than 1 and the

1 Mears criterion value is less than 0.15, indicating that there is no mass transfer effect under  
 2 this experimental condition.

3 **Table SI-8** Effect of internal and external diffusion at different reaction temperatures

| $T/^\circ\text{C}$ | $r_{A,obs}/$<br>mol/kg/s | $k_A/$<br>m/s         | $D_{A,e}/$<br>$\text{cm}^2/\text{s}$ | $C_{A,S}/$<br>mol/ $\text{m}^3$ | $\frac{-r_{A,obs}\rho_p R_p n}{k_A C_{A,S}}$ | $\Phi_A = \frac{-r_{obs}\rho_p R_p^2}{D_{A,e} C_{A,S}}$ |
|--------------------|--------------------------|-----------------------|--------------------------------------|---------------------------------|----------------------------------------------|---------------------------------------------------------|
| 190                | $2.37 \times 10^{-4}$    | $4.96 \times 10^{-8}$ | $7.71 \times 10^{-7}$                | $1.02 \times 10^6$              | 0.000256                                     | $2.05 \times 10^{-5}$                                   |
| 215                | $3.13 \times 10^{-4}$    | $4.76 \times 10^{-8}$ | $1.05 \times 10^{-6}$                | $1.02 \times 10^6$              | 0.000351                                     | $1.99 \times 10^{-5}$                                   |
| 240                | $3.53 \times 10^{-4}$    | $4.59 \times 10^{-8}$ | $1.39 \times 10^{-6}$                | $1.02 \times 10^6$              | 0.000411                                     | $1.69 \times 10^{-5}$                                   |

4

5

## 6 9.2 Kinetic experiment data

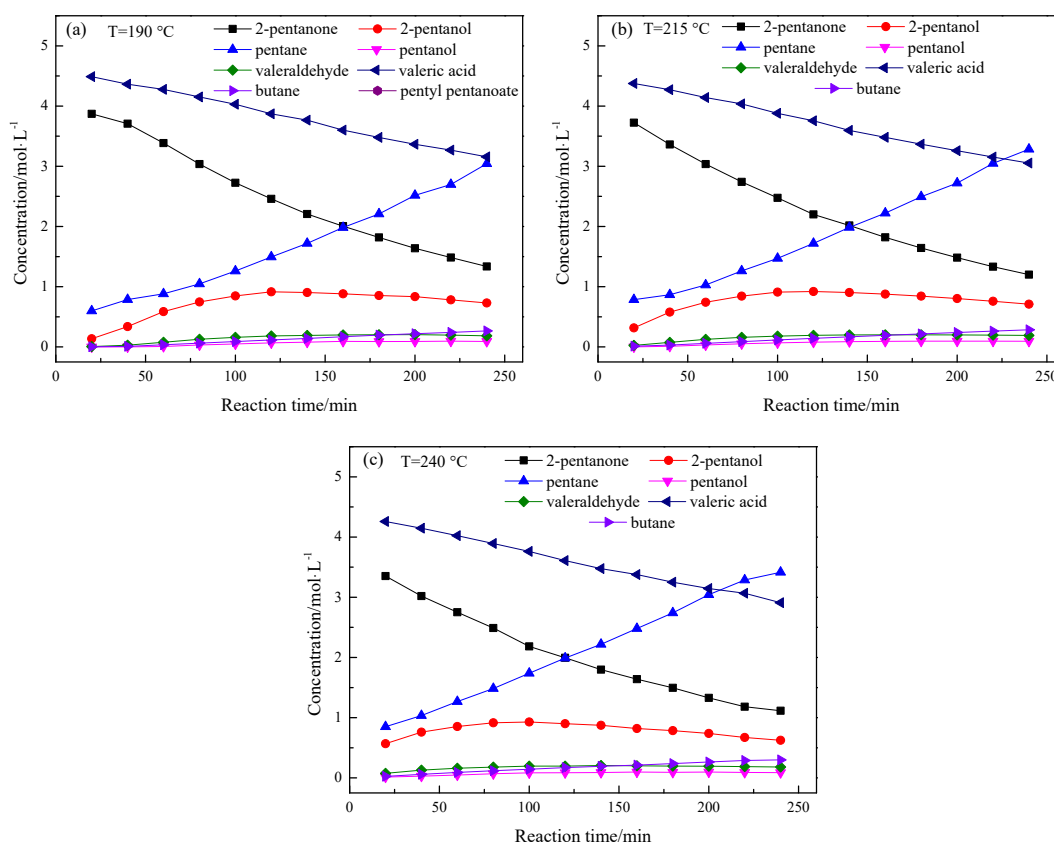

**Figure SI-4** Concentration of each component vs reaction time at different temperatures

(a):190 °C, (b): 215, (c):240 °C

## 11 10. Levulinic acid HDO reaction kinetics

### 12 10.1 Effect of internal and external diffusion at different reaction temperatures

13 The Weisz-Prater criterion and the Mears criterion were used to calculate the effects of  
 14 internal and external diffusion at 190 °C, 215 °C, and 240 °C, respectively. The results are

1 shown in Table SI-9. It can be seen that the Weisz-Prater criterion value is less than 1 and the  
 2 Mears criterion value is less than 0.15, indicating that there is no mass transfer effect under  
 3 the experimental condition.

4 **Table SI-9** Effect of internal and external diffusion at different reaction temperatures

| T/°C | $r_{A,obs}/$<br>mol/kg/s | $k_A/$<br>m/s         | $D_{A,e}/$<br>cm <sup>2</sup> /s | $C_{A,S}/$<br>mol/m <sup>3</sup> | $\frac{-r_{A,obs}\rho_p R_p n}{k_A C_{A,S}}$ | $\Phi_A = \frac{-r_{obs}\rho_p R_p^2}{D_{A,e} C_{A,S}}$ |
|------|--------------------------|-----------------------|----------------------------------|----------------------------------|----------------------------------------------|---------------------------------------------------------|
| 190  | $2.37 \times 10^{-4}$    | $4.96 \times 10^{-8}$ | $7.71 \times 10^{-7}$            | $1.02 \times 10^6$               | 0.000256                                     | $2.05 \times 10^{-5}$                                   |
| 215  | $3.13 \times 10^{-4}$    | $4.76 \times 10^{-8}$ | $1.05 \times 10^{-6}$            | $1.02 \times 10^6$               | 0.000351                                     | $1.99 \times 10^{-5}$                                   |
| 240  | $3.53 \times 10^{-4}$    | $4.59 \times 10^{-8}$ | $1.39 \times 10^{-6}$            | $1.02 \times 10^6$               | 0.000411                                     | $1.69 \times 10^{-5}$                                   |

5

## 6 10.2 Kinetic experiment data

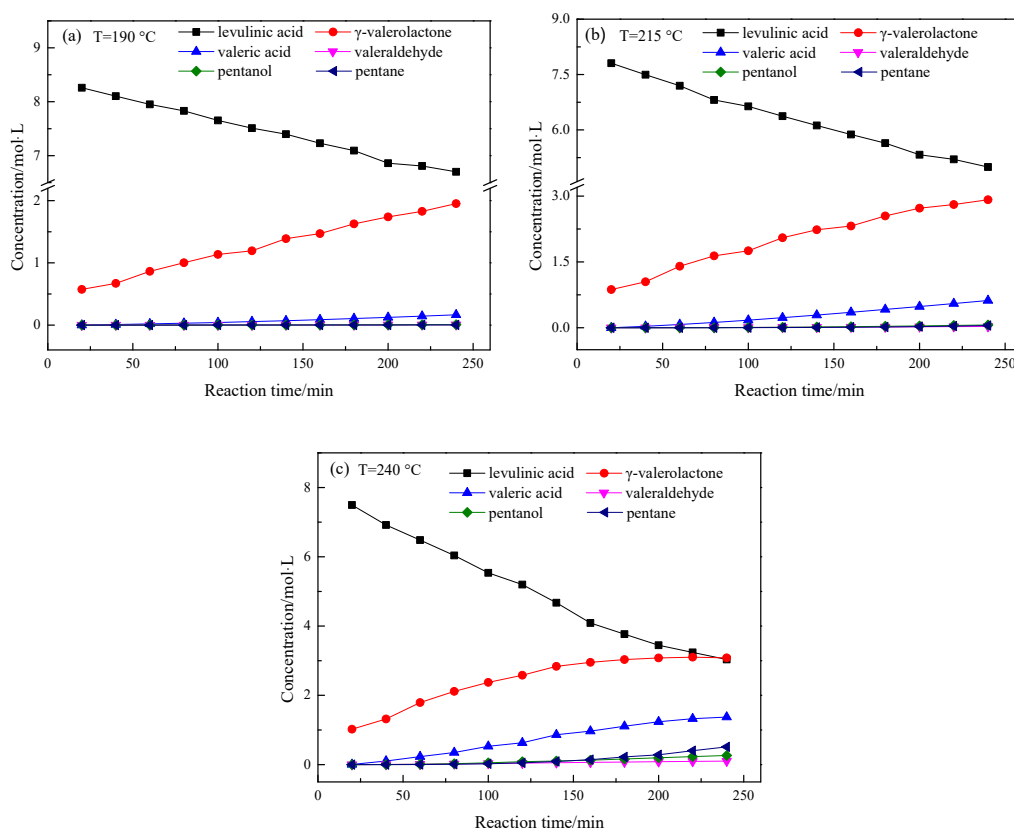

**Figure SI-5** Concentration of each component vs reaction time at different temperatures  
 (a):190 °C, (b): 215, (c):240 °C

1  
2  
3  
4  
5  
6  
7  
8  
9  
10  
11  
12  
13

14 **11. HDO reaction kinetic model statistics**

15

**Table SI-10 Model Statistics**

| Model                                   | Reaction temperature /°C | Experiment No. | Free variation No. | Regression square sum | Residual squares sum | Correlation index | F    |
|-----------------------------------------|--------------------------|----------------|--------------------|-----------------------|----------------------|-------------------|------|
| 2-Pentanone                             | 150                      | 10             |                    | 27.13                 | 0.0506               | 0.9992            |      |
|                                         | 170                      | 10             | 3                  | 13.46                 | 0.0162               | 0.9996            | 1199 |
|                                         | 190                      | 10             |                    | 2.55                  | 0.0146               | 0.9993            |      |
|                                         | 150                      | 10             |                    | 23.77                 | 0.0518               | 0.9985            |      |
|                                         | 170                      | 10             | 3                  | 13.18                 | 0.0251               | 0.9991            | 955  |
|                                         | 190                      | 10             |                    | 2.58                  | 0.0106               | 0.9983            |      |
|                                         | 150                      | 10             |                    | 22.75                 | 0.0513               | 0.9986            |      |
|                                         | 170                      | 10             | 3                  | 9.62                  | 0.0169               | 0.9985            | 849  |
|                                         | 190                      | 10             |                    | 1.74                  | 0.0223               | 0.9741            |      |
| Valeric acid                            | 220                      | 12             |                    | 12.02                 | 0.0341               | 0.9983            |      |
|                                         | 230                      | 12             | 3                  | 11.11                 | 0.0262               | 0.9972            | 1753 |
|                                         | 240                      | 12             |                    | 9.69                  | 0.0099               | 0.9943            |      |
|                                         | 220                      | 12             |                    | 10.17                 | 0.0082               | 0.9957            |      |
|                                         | 230                      | 12             | 3                  | 15.00                 | 0.0547               | 0.9790            | 1910 |
|                                         | 240                      | 12             |                    | 11.78                 | 0.0302               | 0.9854            |      |
|                                         | 220                      | 12             |                    | 11.38                 | 0.0270               | 0.9865            |      |
|                                         | 230                      | 12             | 3                  | 12.16                 | 0.0325               | 0.9843            | 1126 |
|                                         | 240                      | 12             |                    | 16.67                 | 0.0505               | 0.9824            |      |
|                                         | 220                      | 12             |                    | 17.41                 | 0.0749               | 0.9747            |      |
|                                         | 230                      | 12             | 3                  | 19.69                 | 0.0695               | 0.9792            | 679  |
|                                         | 240                      | 12             |                    | 23.13                 | 0.1413               | 0.9651            |      |
| 220                                     | 12                       |                | 15.28              | 0.0316                | 0.9986               |                   |      |
| 230                                     | 12                       | 3              | 12.91              | 0.0763                | 0.9998               | 1199              |      |
| 240                                     | 12                       |                | 11.89              | 0.0217                | 0.9969               |                   |      |
| Mixture of 2-pentanone and valeric acid | 190                      | 12             |                    | 12.72                 | 0.0104               | 0.9907            |      |
|                                         | 215                      | 12             | 3                  | 11.89                 | 0.0135               | 0.9912            | 2466 |
|                                         | 240                      | 12             |                    | 10.88                 | 0.0299               | 0.9880            |      |
|                                         | 190                      | 12             |                    | 10.32                 | 0.0694               | 0.9847            |      |
|                                         | 215                      | 12             | 3                  | 2.87                  | 0.0090               | 0.9965            | 519  |
|                                         | 240                      | 12             |                    | 1.63                  | 0.0325               | 0.9967            |      |
|                                         | 190                      | 12             |                    | 3.34                  | 0.0143               | 0.9978            |      |
|                                         | 215                      | 12             | 3                  | 4.69                  | 0.0113               | 0.9988            | 719  |
|                                         | 240                      | 12             |                    | 0.84                  | 0.0120               | 0.9835            |      |
| 190                                     | 12                       |                | 3.17               | 0.0036                | 0.9967               |                   |      |
| 215                                     | 12                       | 3              | 2.51               | 0.0041                | 0.9899               | 2488              |      |



|  |     |    |   |       |        |        |      |
|--|-----|----|---|-------|--------|--------|------|
|  | 240 | 12 |   | 2.46  | 0.0025 | 0.9996 |      |
|  | 190 | 12 |   | 13.75 | 0.0226 | 0.9965 |      |
|  | 215 | 12 | 3 | 14.57 | 0.0357 | 0.9979 | 1355 |
|  | 240 | 12 |   | 10.89 | 0.0322 | 0.9986 |      |
|  | 190 | 12 |   | 11.15 | 0.0198 | 0.9993 |      |
|  | 215 | 12 | 3 | 8.34  | 0.0159 | 0.9989 | 2212 |
|  | 240 | 12 |   | 12.43 | 0.0111 | 0.9992 |      |
|  | 190 | 12 |   | 9.99  | 0.0322 | 0.9991 |      |
|  | 215 | 12 | 3 | 2.26  | 0.0175 | 0.9968 | 1017 |
|  | 240 | 12 |   | 2.04  | 0.0035 | 0.9985 |      |

1

2

**Table SI-10** Model Statistics (Continuation)

| Model          | Reaction temperature /°C | Experiment No. | Free variation No. | Regression square sum | Residual squares sum | Correlation index | F    |
|----------------|--------------------------|----------------|--------------------|-----------------------|----------------------|-------------------|------|
|                | 190                      | 12             |                    | 12.79                 | 0.0402               | 0.9852            |      |
|                | 215                      | 12             | 3                  | 12.38                 | 0.0298               | 0.9877            | 1017 |
|                | 240                      | 12             |                    | 16.35                 | 0.0575               | 0.9832            |      |
|                | 190                      | 12             |                    | 19.14                 | 0.1031               | 0.9731            |      |
|                | 215                      | 12             | 3                  | 11.10                 | 0.0412               | 0.9808            | 912  |
|                | 240                      | 12             |                    | 9.88                  | 0.0216               | 0.9893            |      |
|                | 190                      | 12             |                    | 10.55                 | 0.0312               | 0.9852            |      |
|                | 215                      | 12             | 3                  | 18.73                 | 0.0786               | 0.9793            | 1427 |
|                | 240                      | 12             |                    | 11.23                 | 0.0132               | 0.9998            |      |
| Levulinic acid | 190                      | 12             |                    | 8.94                  | 0.0015               | 0.9987            |      |
|                | 215                      | 12             | 3                  | 12.11                 | 0.0112               | 0.9984            | 7332 |
|                | 240                      | 12             |                    | 13.91                 | 0.0478               | 0.9896            |      |
|                | 190                      | 12             |                    | 5.68                  | 0.0064               | 0.9968            |      |
|                | 215                      | 12             | 3                  | 13.09                 | 0.0190               | 0.9987            | 1760 |
|                | 240                      | 12             |                    | 10.78                 | 0.0604               | 0.9979            |      |
|                | 190                      | 12             |                    | 11.12                 | 0.0263               | 0.9991            |      |
|                | 215                      | 12             | 3                  | 10.83                 | 0.0491               | 0.9924            | 948  |
|                | 240                      | 12             |                    | 7.70                  | 0.0253               | 0.9962            |      |

3 **12. NH<sub>3</sub>-TPD analysis results of Ru/HZSM-5 catalysts with different Si/Al ratios**

4

**Table SI-11** Acid properties of Ru/HZSM-5 catalysts with different Si/Al ratio

| Catalyst       | NH <sub>3</sub> desorption peak at lower temperature |                                           | NH <sub>3</sub> desorption peak at medium temperature |                                             | NH <sub>3</sub> desorption peak at higher temperature |                                             | Total acid amount/<br>μmol·g <sup>-1</sup> |
|----------------|------------------------------------------------------|-------------------------------------------|-------------------------------------------------------|---------------------------------------------|-------------------------------------------------------|---------------------------------------------|--------------------------------------------|
|                | Peak top temperature/<br>°C                          | Weak acid amount/<br>μmol·g <sup>-1</sup> | Peak top temperature/<br>°C                           | Strong acid amount/<br>μmol·g <sup>-1</sup> | Peak top temperature/<br>°C                           | Strong acid amount/<br>μmol·g <sup>-1</sup> |                                            |
| Ru/HZSM-5(21)  | 190.9                                                | 319.2                                     | 263.9                                                 | 231.6                                       | 347.1                                                 | 143.8                                       | 694.6                                      |
| Ru/HZSM-5(61)  | 184.6                                                | 130.4                                     | —                                                     | —                                           | 303.4                                                 | 194.3                                       | 324.7                                      |
| Ru/HZSM-5(130) | 180.7                                                | 101.0                                     | —                                                     | —                                           | 283.3                                                 | 191.9                                       | 292.9                                      |
| Ru/HZSM-5(360) | 162.1                                                | 26.5                                      | —                                                     | —                                           | 260.0                                                 | 75.3                                        | 101.8                                      |

5 **13. Py-IR analysis results of Ru/HZSM-5 catalysts with different Si/Al ratios**

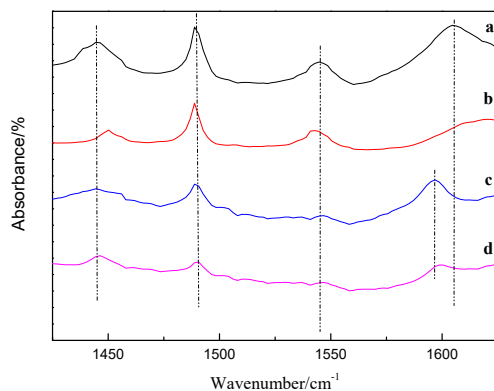

1

2

3

**Fig. SI-6** Py-IR spectra of Ru/HZSM-5 with different Si/Al ratios  
a: HZSM-5(21); b: HZSM-5(60); c: HZSM-5(130); d: HZSM-5(360)

#### 4 Reference

5 [S1] L.L. Zhao, H.L. An, X.Q. Zhao, Y.J. Wang, TiO<sub>2</sub>-catalyzed n-valeraldehyde self-  
6 condensation reaction mechanism and kinetics. ACS Catal. 7 (2017) 4451-4461.

7 <https://doi.org/10.1021/acscatal.7b00432>.

8 [S2] P.F. Zito, A. Caravella, A. Brunetti, E. Drioli, G. Barbieri, Discrimination among gas  
9 translation, surface and Knudsen diffusion in permeation through zeolite membranes. J

10 Membrane Sci. 564 (2018) 166-173. <https://doi.org/10.1016/j.memsci.2018.07.023>

11 [S3] Y. Nannoolal, J. Rarey, D. Ramjugernath, Estimation of pure component properties. Part  
12 4: Estimation of the saturated liquid viscosity of non-electrolyte organic compounds via group

13 contributions and group interactions. Fluid Phase Equilibr, 281 (2009) 97-119.

14 <https://doi.org/10.1016/j.fluid.2009.02.016>.
